# Supplementary material
Source: PubMed Central journal article supplement (PMC3115751)
Supplement: NIHMS276065-supplement-Supp1.pdf [file NIHMS276065-supplement-Supp1.pdf]

**Supplementary Table 1:** Recurrent basal dendrite formation and branch-to-dendrite conversion in control and kainic acid treated explants.

|                                                                      | Control<br>(n=23 cells) | Kainic acid<br>(n=20 cells ) | Z-Test for significance<br>P value |
|----------------------------------------------------------------------|-------------------------|------------------------------|------------------------------------|
| Percentage of granule cells developing recurrent basal dendrites     | 13%                     | 25%                          | 0.54                               |
| Percentage of granule cells exhibiting branch-to-dendrite conversion | 22%                     | 25%                          | 0.90                               |

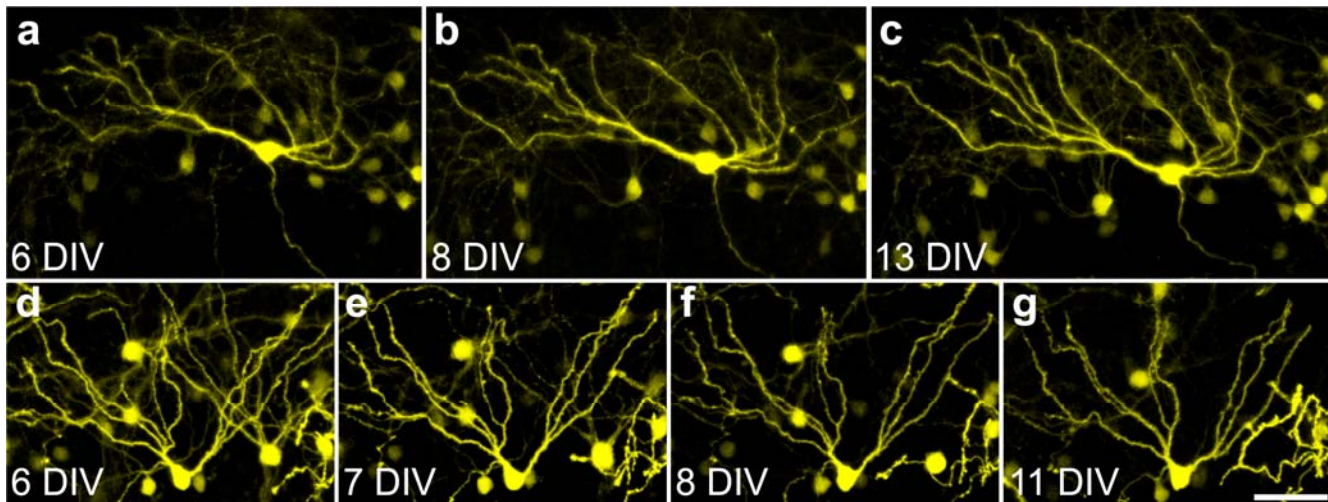

**Supplemental Figure 1:** Serial confocal maximum projections of YFP-expressing granule cells exhibiting stable dendritic structure. Representative images of two YFP-expressing granule cells (**a-c** and **d-g**, respectively) not exhibiting dendritic rearrangements or granule cell dispersion over the course of the imaging period. Scale bar, 50  $\mu\text{m}$ .

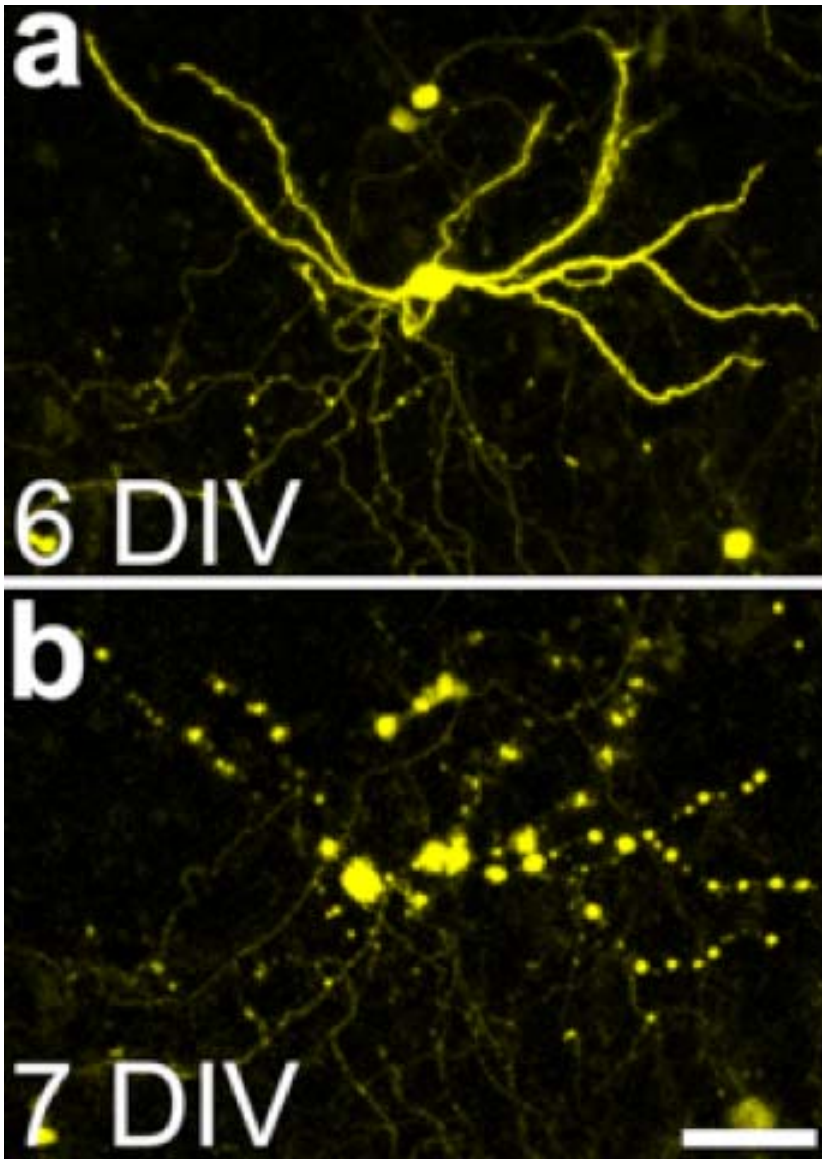

**Supplemental Figure 2:** Serial confocal maximum projections of a dying YFP-expressing granule cell. (a) Confocal maximum projections of a YFP-expressing dentate granule cell after 6 DIV, and during exposure to kainic acid one day later (b). This cell died during exposure, as is evident by the disruption of its processes and compartmentalization of YFP (b). Scale bar, 50  $\mu\text{m}$ .

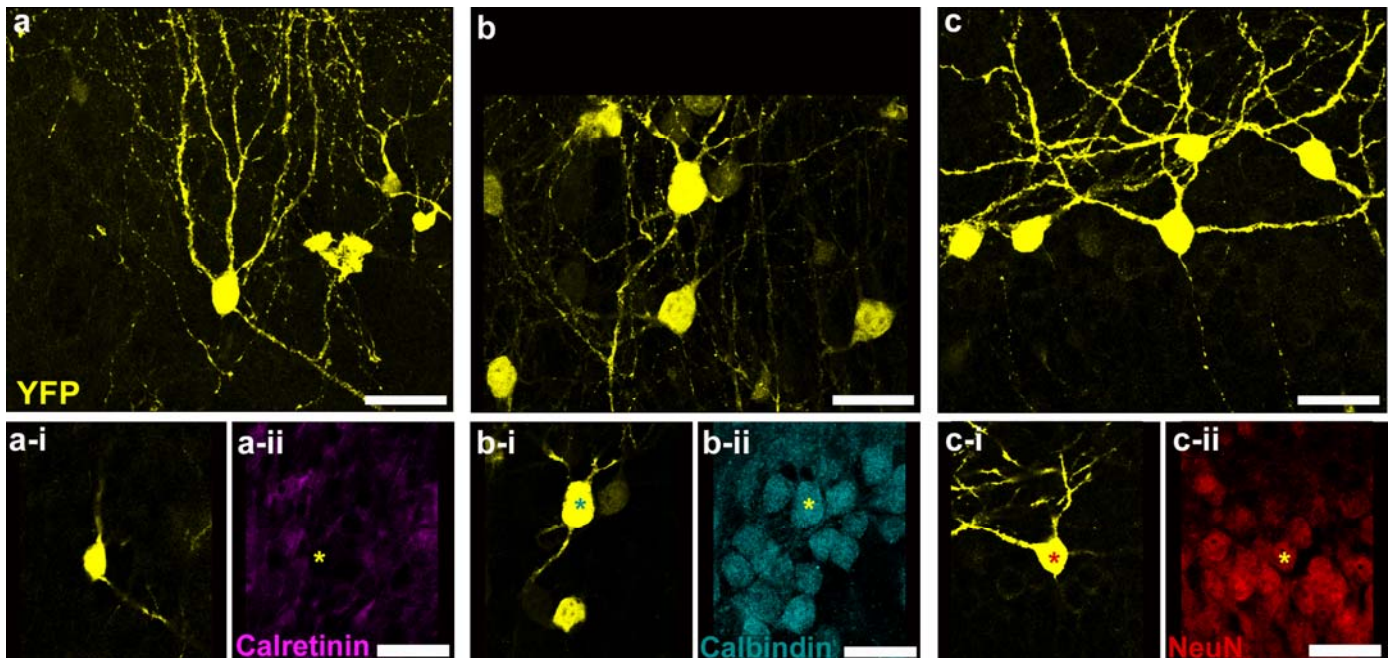

**Supplemental Figure 3:** Postmitotic age of YFP-expressing granule cells *in vitro*. **(a-c)** Representative confocal maximum projections of YFP-expressing dentate granule cells at seven days *in vitro*. **(a)** Optical sections through the granule cell soma showing the lack of colocalization between Thy1-YFP-expression **(a-i)** and calretinin-immunoreactivity **(a-ii, yellow asterisk)**. **(b)** Optical sections through a granule cell soma illustrating the colocalization of Thy1-YFP-expression **(b-i, cyan asterisk)** with calbindin **(b-ii, yellow asterisk)**. **(c)** Optical sections through a granule cell soma demonstrating colocalization of Thy1-YFP-expression **(c-i, red asterisk)** with NeuN **(c-ii, yellow asterisk)**. Scale bars, 30  $\mu\text{m}$ .
